# Supplementary material for: Prevalence of Beijing Central Asian/Russian Cluster 94-32 among Multidrug-Resistant M. tuberculosis in Kazakhstan
Source: MDPI journal article supplement (doi:10.3390/antibiotics13010009), 2023-12-20
Supplement: s1 [file s1]

**Table S1.** Description of *M. tuberculosis* clinical isolates resistant to antituberculosis drugs

| Drug-resistant <i>M. tuberculosis</i> clinical isolates                                                   | n (%)       |
|-----------------------------------------------------------------------------------------------------------|-------------|
| <i>Monoresistant isolates (resistant only to one anti-TB drug):</i>                                       | 49 (16.3%)  |
| resistant only to RMP*                                                                                    | 6 (2%)      |
| resistant only to INH*                                                                                    | 14 (4.7%)   |
| resistant only to EMB*                                                                                    | 7 (2.3%)    |
| resistant only to SM*                                                                                     | 22 (7.3%)   |
| <i>Multidrug resistant isolates (resistant at least to RMP and INH):</i>                                  | 157 (52.3%) |
| resistant to RMP+INH                                                                                      | 13 (4.3%)   |
| resistant to RMP+INH+EMB                                                                                  | 3 (1%)      |
| resistant to RMP+INH+SM                                                                                   | 30 (10%)    |
| resistant to RMP+INH+EMB+SM                                                                               | 111 (37%)   |
| <i>Polyresistant isolates (resistant at least to two or more antibiotics except RMP+INH combination):</i> | 94 (31.3%)  |
| resistant to INH+EMB                                                                                      | 4 (1.33%)   |
| resistant to INH+SM                                                                                       | 25 (8.32%)  |
| resistant to INH+EMB+SM                                                                                   | 28 (9.32%)  |
| resistant to RMP+EMB                                                                                      | 1 (0.33%)   |
| resistant to RMP+SM                                                                                       | 10 (3.32%)  |
| resistant to RMP+EMB+SM                                                                                   | 1 (0.33%)   |
| resistant to EMB+SM                                                                                       | 25 (8.32%)  |
| <i>Total:</i>                                                                                             | 300 (100%)  |

\*RMP – rifampicin; INH – isoniazid; EMB – ethambutol; SM – streptomycin.

**Table S2.** Sequences of primers used in AS-RT-PCR to determine resistance in the analyzed *M. tuberculosis* genes

| Genetic locus | Codon | Primer name | Nucleotide sequence (5'-3') |
|---------------|-------|-------------|-----------------------------|
| <i>katG</i>   | 315   | Mt315F      | GTAAGGACGCGATCACCAC         |
|               |       | Wt315F      | GTAAGGACGCGATCACCAG         |
|               |       | 315R        | GAAACTGTTGTCCCATTTTCG       |
| <i>rpoB</i>   | 531   | Mt531F      | CACAAGCGCCGACTGTT           |
|               |       | Wt531F      | CACAAGCGCCGACTGTC           |
|               |       | 531R        | GGCACGCTCACGTGACAGAC        |
